# Supplementary material for: Century-scale simulations of the response of the West Antarctic Ice Sheet to a warming climate
Source: Copernicus journal article supplement (doi:10.5194/tc-9-1579-2015), 2015-08-18
Supplement: Supplementary file 2 [file tc-9-1579-2015-supplement.zip]

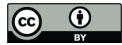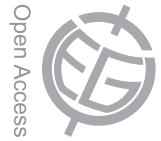

## *Supplement of*

# **Century-scale simulations of the response of the West Antarctic Ice Sheet to a warming climate**

**S. L. Cornford et al.**

*Correspondence to:* S. L. Cornford (s.l.cornford@bristol.ac.uk)

- tc-9-1579-2015-supplement-title-page.pdf
- ase\_HA0F\_250m.mp4
- ase\_HA0F\_4km.mp4
- ase\_HA0ppF\_250m.mp4
- cornford\_tc\_wais\_vaf.csv
- fig5\_magnified\_net\_delta\_vaf\_to\_2100.pdf
- fig6\_magnified\_dynamic\_delta\_vaf\_to\_2100.pdf
- fig7\_large.pdf
- fris\_HA0F\_625m.mp4
- supplement\_contents.txt

The copyright of individual parts of the supplement might differ from the CC-BY 3.0 licence.
