# Supplementary figures and images for: Century-scale simulations of the response of the West Antarctic Ice Sheet to a warming climate
Source: Copernicus journal article supplement (doi:10.5194/tc-9-1579-2015), 2015-08-18

$\Delta V$  ( $10^3 \text{ km}^3 = 2.5 \text{ mm s.l.e}$ )

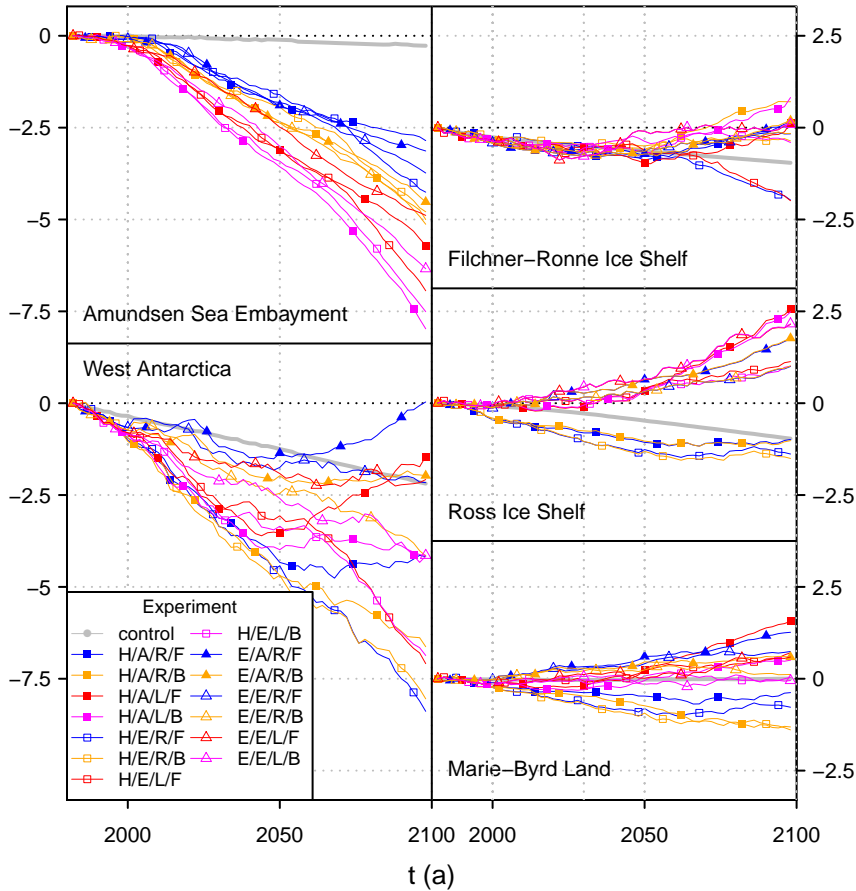

Supplement: Supplementary file 1 [file tc-9-1579-2015-supplement.zip]

# Grounding line

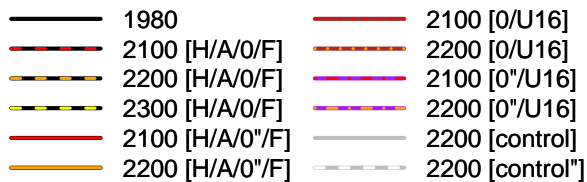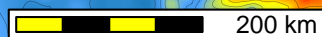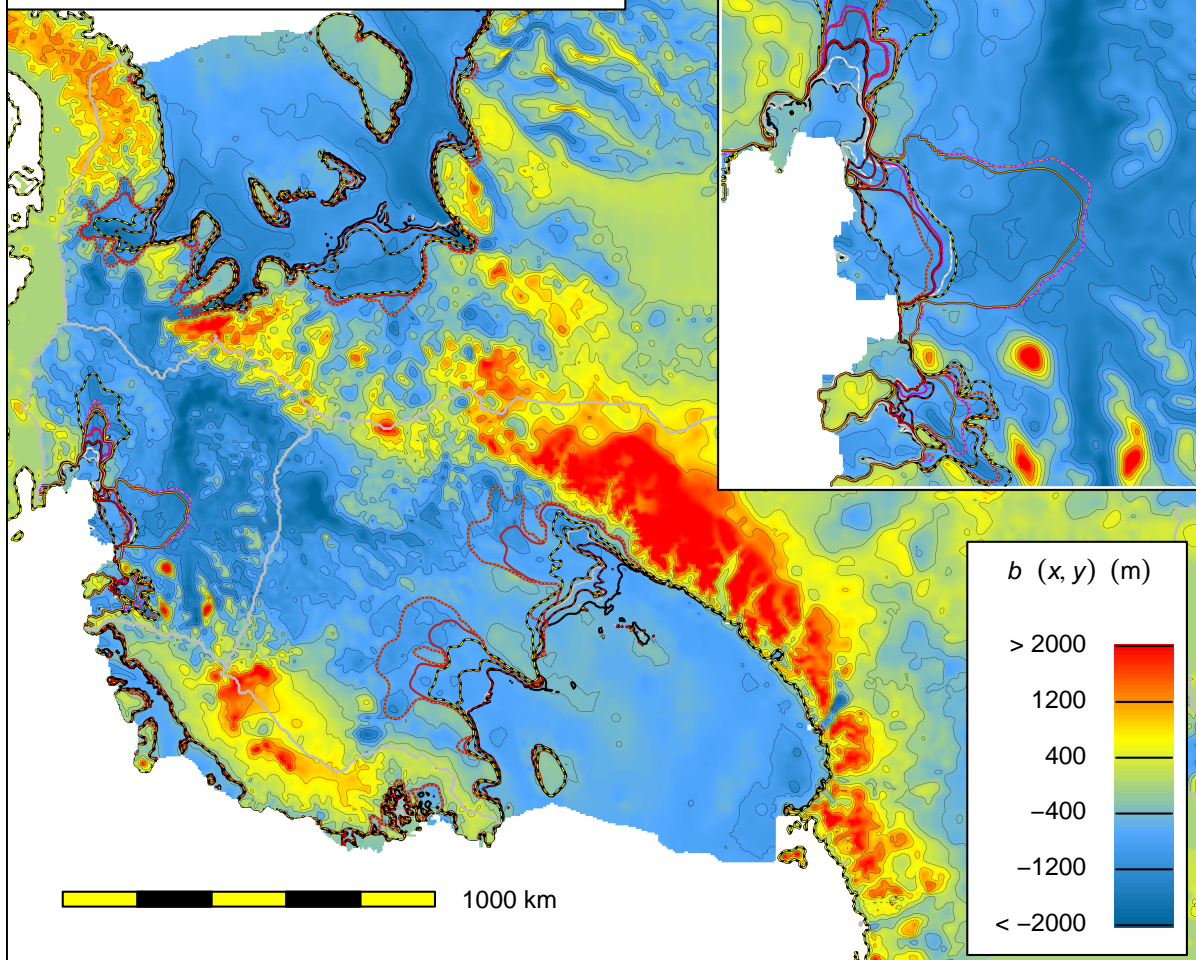

$b(x, y)$  (m)

> 2000

1200

400

-400

-1200

< -2000

Supplement: Supplementary file 3 [file tc-9-1579-2015-supplement.zip]

$\Delta V - A\overline{\Delta a} \text{ (} 10^3 \text{ km}^3 = 2.5 \text{ mm s.l.e.)}$

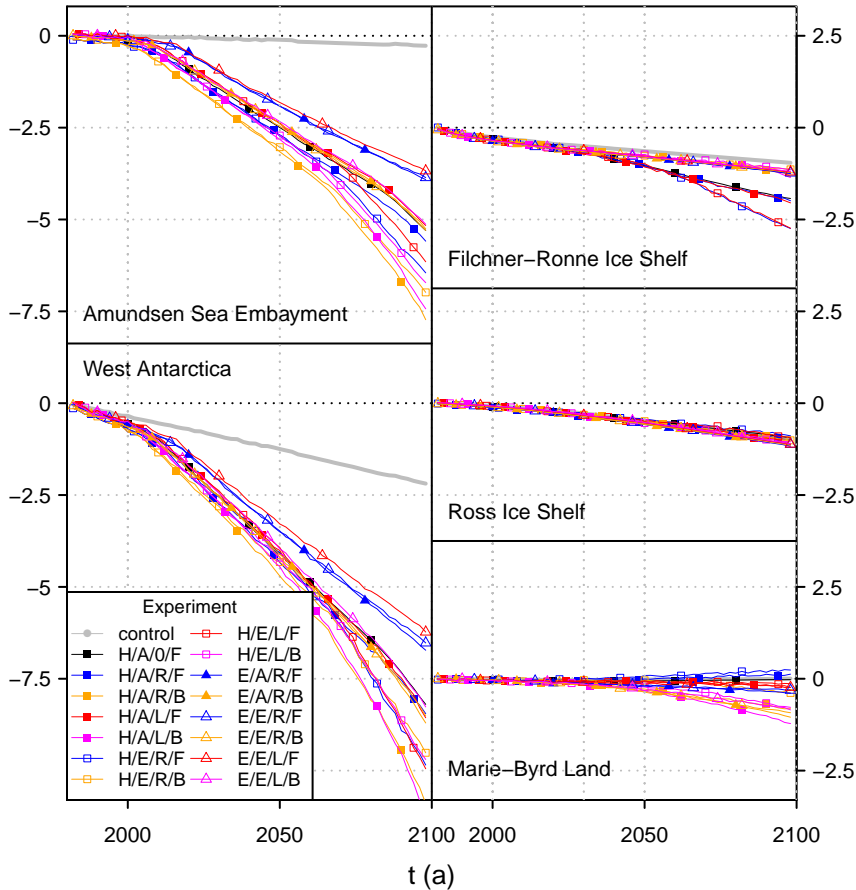

Supplement: Supplementary file 4 [file tc-9-1579-2015-supplement.zip]
